# Supplementary material
Source: PubMed Central journal article supplement (PMC3672656)
Supplement: cmdc0006-0514-sd1.pdf [file cmdc0006-0514-sd1.pdf]

## Supporting Information

© Copyright Wiley-VCH Verlag GmbH & Co. KGaA, 69451 Weinheim, 2011

### **Thiazolidinedione-Based PI3K $\alpha$ Inhibitors: An Analysis of Biochemical and Virtual Screening Methods**

Jo-Anne Pinson,<sup>[a]</sup> Oleg Schmidt-Kittler,<sup>[b]</sup> Jiuxiang Zhu,<sup>[b]</sup> Ian G. Jennings,<sup>[a]</sup>  
Kenneth W. Kinzler,<sup>[b]</sup> Bert Vogelstein,<sup>[b]</sup> David K. Chalmers,<sup>[a]</sup> and Philip E. Thompson<sup>\*[a]</sup>

cmdc\_201000467\_sm\_miscellaneous\_information.pdf

## Supplementary data for Pinson et al

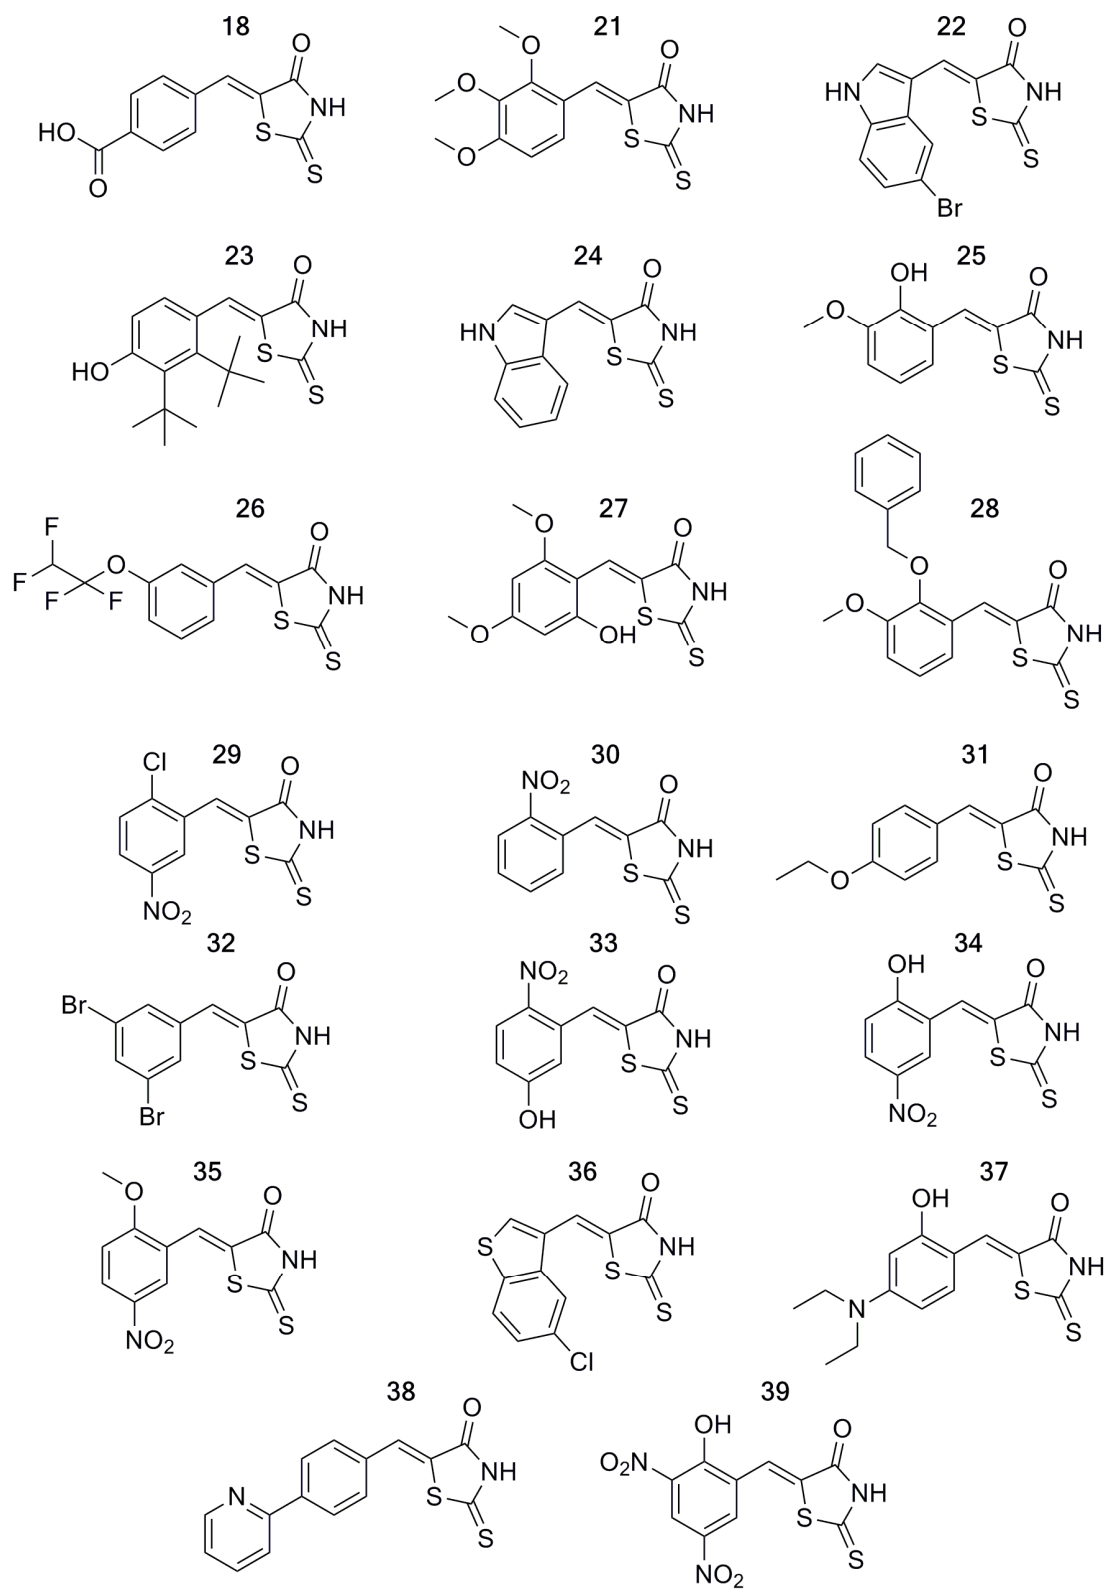

Figure S1. Compound structures not described in main text.

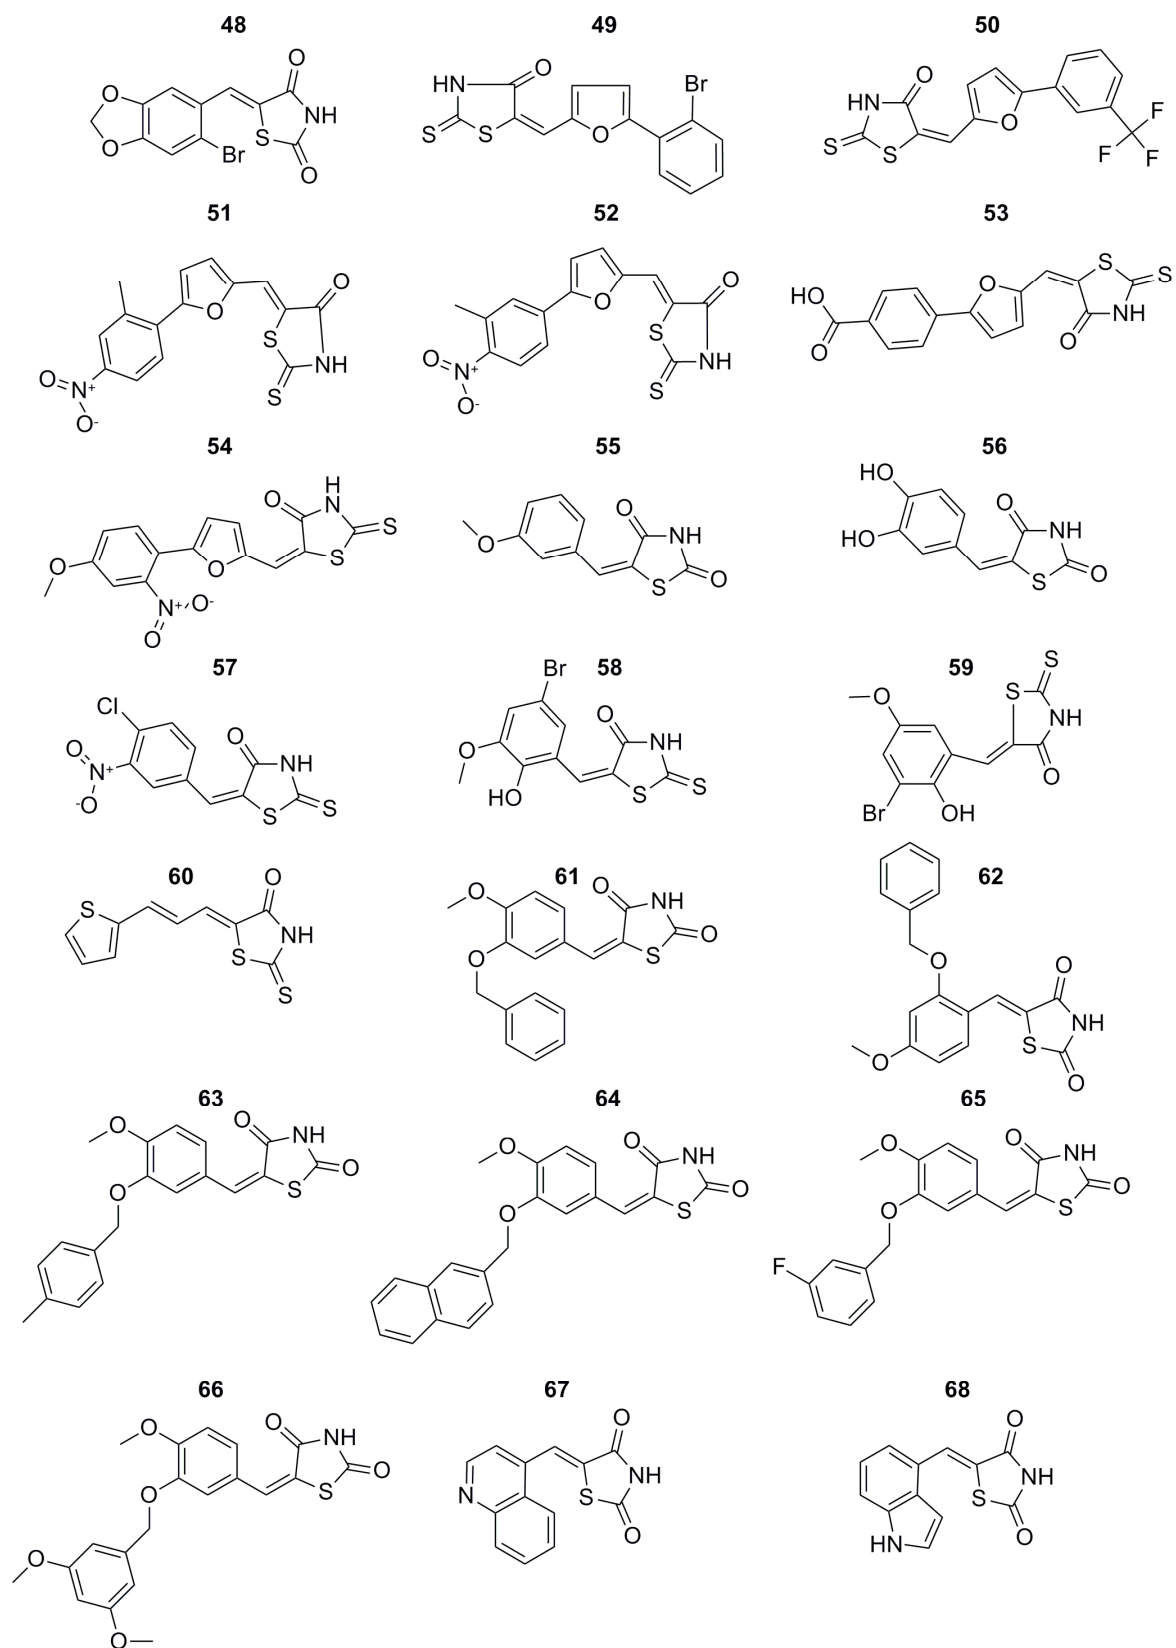

Figure S1 cont.. Compound structures not described in main text.

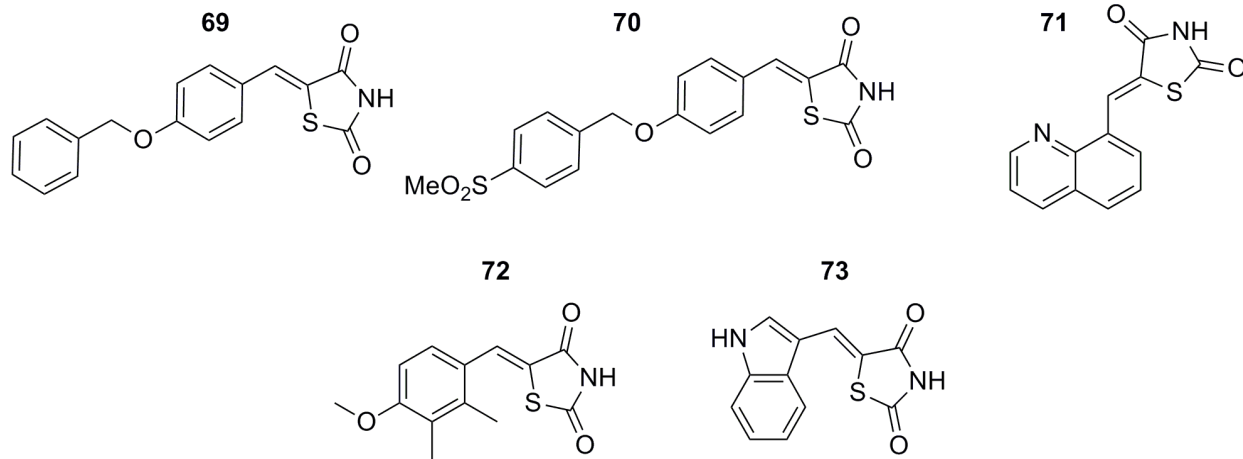

Figure S1 cont.. Compound structures not described in main text.

| Compound # | IC50 v. PI3K $\alpha$ | IC50 v. PI3K $\gamma$ | $\alpha/\gamma$ | Compound # | IC50 v. PI3K $\alpha$ | IC50 v. PI3K $\gamma$ | $\alpha/\gamma$ |
|------------|-----------------------|-----------------------|-----------------|------------|-----------------------|-----------------------|-----------------|
| 1 AS604850 | 4.5                   | 0.25                  | 18              | 38         | >100                  | >100                  | 1.0             |
| 2 AS605240 | 0.060                 | 0.0080                | 7.5             | 39         | 14                    | 9.2                   | 1.5             |
| 3          | 0.050                 | 0.040                 | 1.3             | 40         | 3.0                   | .41                   | 7.3             |
| 4          | 0.27                  | 0.11                  | 2.5             | 41         | 11                    | 1.4                   | 7.9             |
| 5          | .45                   | .12                   | 3.8             | 42         | 0.14                  | 0.060                 | 2.3             |
| 6          | 50                    | >100                  | <0.50           | 43         | 8.7                   | >100                  | <0.087          |
| 7          | 1.9                   | 1.0                   | 1.9             | 44         | 9.0                   | >100                  | <0.090          |
| 8          | 7.3                   | 27                    | 0.27            | 45         | 0.40                  | 0.20                  | 2.0             |
| 9          | 4.4                   | 9.3                   | 0.47            | 46         | 4.0                   | 3.5                   | 1.1             |
| 10         | 2.7                   | 4.9                   | 0.55            | 47         | 0.80                  | 1.0                   | 0.80            |
| 11         | 0.069                 | 0.042                 | 1.6             | 48         | 33                    | 70                    | 0.47            |
| 12         | 0.15                  | 0.12                  | 1.2             | 49         | 6.0                   | 6.0                   | 1.              |
| 13         | 2.7                   | 0.25                  | 11              | 50         | 6.0                   | 8.0                   | 0.75            |
| 14         | 11                    | 1.5                   | 7.1             | 51         | 0.70                  | 0.70                  | 1.0             |
| 15         | 9.4                   | 3.1                   | 3.0             | 52         | 4.0                   | 3.5                   | 1.1             |
| 16         | 86                    | 4.0                   | 22              | 53         | 15                    | 9.5                   | 1.6             |
| 17         | 22                    | 1.4                   | 16              | 54         | 14                    | 10                    | 1.4             |
| 18         | >100                  | >100                  | 1.0             | 55         | 1.0                   | 1.0                   | 1.0             |
| 19         | .0028                 | .0013                 | 2.2             | 56         | 3.5                   | 1.2                   | 2.9             |
| 20         | 8.3                   | .62                   | 13              | 57         | 7.5                   | 2.5                   | 3.0             |
| 21         | 68                    | >100                  | <0.68           | 58         | 2.6                   | 4.0                   | 0.65            |
| 22         | 15                    | 15                    | 1               | 59         | 1.2                   | 2.0                   | 0.60            |
| 23         | 30                    | 24                    | 1.3             | 60         | 3.7                   | 3.5                   | 1.1             |
| 24         | >100                  | >100                  | 1.0             | 61         | 50                    | >100                  | <0.5            |
| 25         | >100                  | >100                  | 1.0             | 62         | >100                  | >100                  | 1.0             |
| 26         | 14                    | 14                    | 1.0             | 63         | >100                  | >100                  | 1.0             |
| 27         | 11                    | 9.2                   | 1.2             | 64         | >100                  | >100                  | 1.0             |
| 28         | >100                  | >100                  | 1.0             | 65         | >100                  | >100                  | 1.0             |
| 29         | 42                    | 16                    | 2.6             | 66         | >100                  | >100                  | 1.0             |
| 30         | >100                  | >100                  | 1.0             | 67         | 1.8                   | 1.0                   | 1.8             |
| 31         | 5.4                   | 9.1                   | 0.59            | 68         | >100                  | >100                  | 1.0             |
| 32         | >100                  | >100                  | 1.0             | 69         | >100                  | >100                  | 1.0             |
| 33         | 7.2                   | 4.9                   | 1.5             | 70         | >100                  | >100                  | 1.0             |
| 34         | 23                    | 6.7                   | 3.4             | 71         | >100                  | >100                  | 1.0             |
| 35         | 28                    | 13                    | 2.2             | 72         | 20                    | 26                    | 0.77            |
| 36         | 30                    | 11                    | 2.6             | 73         | >100                  | >100                  | 1.0             |
| 37         | 64                    | >100                  | <0.64           |            |                       |                       |                 |

Table S1 IC50 data for inhibition of PI3K $\alpha$  and PI3K $\gamma$

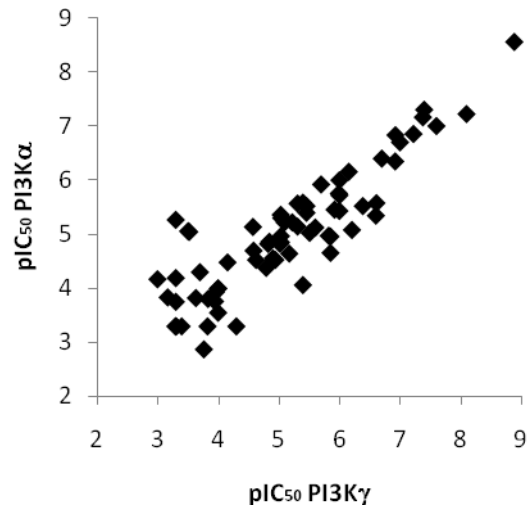

Figure S2. Plot of pIC<sub>50</sub> values for PI3K $\alpha$  versus  $\gamma$  isoforms.

| Compound  | Estimated pKa | Compound  | Estimated pKa |
|-----------|---------------|-----------|---------------|
| <b>3</b>  | 7.53          | <b>24</b> | 8.16          |
| <b>8</b>  | 8.44          | <b>25</b> | 7.37          |
| <b>9</b>  | 7.68          | <b>26</b> | 7.33          |
| <b>10</b> | 7.80          | <b>27</b> | NR *          |
| <b>11</b> | 8.01          | <b>28</b> | 7.34          |
| <b>12</b> | 7.95          | <b>29</b> | 6.77          |
| <b>13</b> | 7.72          | <b>30</b> | 7.22          |
| <b>14</b> | 6.42          | <b>31</b> | 7.83          |
| <b>15</b> | 7.11          | <b>32</b> | 6.98          |
| <b>16</b> | 7.07          | <b>33</b> | 7.60          |
| <b>17</b> | 6.98          | <b>34</b> | 7.11          |
| <b>18</b> | 7.60          | <b>35</b> | 6.86          |
| <b>19</b> | 7.08          | <b>36</b> | 7.46          |
| <b>20</b> | 7.53          | <b>37</b> | 8.04          |
| <b>21</b> | 7.55          | <b>38</b> | 7.46          |
| <b>22</b> | 7.56          | <b>39</b> | 6.54          |
| <b>23</b> | 7.98          |           |               |

Table S2. pKa values calculated using ACD ChemsSketch for thirty-three synthesized rhodanines. \* Compound failed using two versions of software, thus likely not considered weakly acidic.



| Compound #<br>(protonated) | G-Score<br>(2rd0) | G-Score<br>(2a5u) | G-Score<br>(2wxl) | Compound #<br>(protonated) | G-Score<br>(2rd0) | G-Score<br>(2a5u) | G-Score<br>(2wxl) |
|----------------------------|-------------------|-------------------|-------------------|----------------------------|-------------------|-------------------|-------------------|
| 1 AS604850                 | -5.95             | -9.34             | -7.79             | 38                         | -5.77             | -7.95             | -6.97             |
| 2 AS605240                 | -8.10             | -7.59             | -8.03             | 39                         | -6.22             | -5.39             | -7.63             |
| 3                          | -6.95             | -8.50             | -9.41             | 40                         | -5.84             | -7.54             | -8.34             |
| 4                          | -6.64             | -9.06             | -9.71             | 41                         | -6.86             | -8.10             | -6.69             |
| 5                          | -6.86             | -8.44             | -8.53             | 42                         | -6.47             | -7.31             | -8.85             |
| 6                          | -7.20             | -6.03             | -10.21            | 43                         | -6.55             | -6.57             | -9.64             |
| 7                          | -7.20             | -7.42             | -9.60             | 44                         | -5.23             | -7.18             | -7.60             |
| 8                          | -5.92             | -10.15            | -6.07             | 45                         | -2.96             | -6.31             | -8.32             |
| 9                          | -5.47             | -8.11             | -8.42             | 46                         | -5.36             | -6.93             | -7.56             |
| 10                         | -6.49             | -7.49             | -8.08             | 47                         | -6.41             | -9.69             | -10.47            |
| 11                         | -5.60             | -8.24             | -7.11             | 48                         | -7.60             | -6.76             | -8.65             |
| 12                         | -5.50             | -8.20             | -8.95             | 49                         | -6.43             | -7.21             | -8.04             |
| 13                         | -8.32             | -7.54             | -9.82             | 50                         | -6.48             | -6.88             | -8.60             |
| 14                         | -5.88             | -6.27             | -6.98             | 51                         | -5.58             | -7.22             | -7.76             |
| 15                         | -5.54             | -6.74             | -8.76             | 52                         | -5.00             | -6.50             | -8.12             |
| 16                         | -6.66             | -5.81             | -8.38             | 53                         | -6.32             | -7.78             | -10.09            |
| 17                         | -6.67             | -7.71             | -7.68             | 54                         | -6.18             | -7.71             | -7.91             |
| 18                         | -7.16             | -9.31             | -8.75             | 55                         | -6.02             | -8.24             | -8.03             |
| 19                         | -7.56             | -6.37             | -8.19             | 56                         | -6.68             | -10.13            | -11.73            |
| 20                         | -6.53             | -5.96             | -9.01             | 57                         | -6.63             | -8.85             | -8.22             |
| 21                         | -7.02             | -4.25             | -7.81             | 58                         | -6.61             | -5.43             | -6.96             |
| 22                         | -6.33             | -8.21             | -8.30             | 59                         | -7.12             | -5.37             | -6.97             |
| 23                         | -6.53             | -3.75             | -3.57             | 60                         | -5.99             | -5.46             | -6.35             |
| 24                         | -7.08             | -7.41             | -7.31             | 61                         | -7.19             | -5.47             | -8.56             |
| 25                         | -6.91             | -5.65             | -7.80             | 62                         | -7.19             | -7.31             | -9.72             |
| 26                         | -7.09             | -8.01             | -8.50             | 63                         | -6.23             | -6.09             | -9.55             |
| 27                         | -5.76             | -7.92             | -7.97             | 64                         | -6.86             | -7.50             | -9.80             |
| 28                         | -6.95             | -5.83             | -5.90             | 65                         | -7.41             | -5.92             | -9.19             |
| 29                         | -5.68             | -7.19             | -5.85             | 66                         | -7.42             | -8.90             | -9.66             |
| 30                         | -6.42             | -6.54             | -6.80             | 67                         | -5.64             | -7.85             | -7.94             |
| 31                         | -6.60             | -7.51             | -8.32             | 68                         | -7.33             | -6.60             | -7.99             |
| 32                         | -6.17             | -8.48             | -6.44             | 69                         | -7.03             | -6.90             | -9.05             |
| 33                         | -6.47             | -6.69             | -6.69             | 70                         | -5.71             | -8.11             | -8.93             |
| 34                         | -5.24             | -7.50             | -7.94             | 71                         | -6.12             | -7.03             | -8.59             |
| 35                         | -5.60             | -5.15             | -6.97             | 72                         | -6.38             | -5.58             | -7.73             |
| 36                         | -6.10             | -7.75             | -8.48             | 73                         | -5.54             | -7.62             | -8.58             |
| 37                         | -5.44             | -8.11             | -6.38             |                            |                   |                   |                   |

Table S3. GlideScore (G-Score) docking results of 73 protonated compounds for X-ray structures 2rd0, 2a5u and 2wxl.

| Compound #<br>(deprotonated) | G-Score<br>(2rd0) | G-Score<br>(2a5u) | G-Score<br>(2wxl) | Compound #<br>(deprotonated) | G-Score<br>(2rd0) | G-Score<br>(2a5u) | G-Score<br>(2wxl) |
|------------------------------|-------------------|-------------------|-------------------|------------------------------|-------------------|-------------------|-------------------|
| 1 AS604850                   | -7.23             | -7.30             | -8.23             | 38                           | -4.86             | -6.61             | -6.17             |
| 2 AS605240                   | -8.38             | -6.16             | -7.08             | 39                           | -4.83             | -2.81             | -4.93             |
| 3                            | -7.41             | -7.18             | -8.79             | 40                           | -2.87             | -5.62             | -8.11             |
| 4                            | -6.60             | -6.82             | -9.62             | 41                           | -5.25             | -6.88             | -6.62             |
| 5                            | -6.53             | -6.87             | -9.64             | 42                           | -5.50             | -3.45             | -8.27             |
| 6                            | -5.75             | -7.71             | -8.89             | 43                           | -5.85             | -7.16             | -4.97             |
| 7                            | -7.49             | -6.82             | -9.50             | 44                           | -3.97             | -5.82             | -6.93             |
| 8                            | -5.63             | -8.66             | -9.21             | 45                           | -4.92             | -6.73             | -7.42             |
| 9                            | -5.80             | -6.97             | -6.57             | 46                           | -7.78             | -6.21             | -5.59             |
| 10                           | -5.64             | -6.20             | -7.26             | 47                           | -5.63             | -7.47             | -8.60             |
| 11                           | -5.47             | -7.35             | -7.13             | 48                           | -5.75             | -6.32             | -7.98             |
| 12                           | -5.36             | -7.24             | -8.22             | 49                           | -5.66             | -6.11             | -7.66             |
| 13                           | -6.81             | -8.43             | -7.00             | 50                           | -5.09             | -6.53             | -8.47             |
| 14                           | -3.97             | -3.71             | -6.40             | 51                           | -5.17             | -6.60             | -7.08             |
| 15                           | -6.43             | -6.13             | -9.19             | 52                           | -4.99             | -6.74             | -6.84             |
| 16                           | -6.01             | -4.07             | -7.57             | 53                           | -6.32             | -8.12             | -9.46             |
| 17                           | -6.29             | -6.62             | -6.13             | 54                           | -5.52             | -5.37             | -6.73             |
| 18                           | -6.13             | -7.71             | -10.10            | 55                           | -5.79             | -6.52             | -7.27             |
| 19                           | -8.36             | -7.30             | -7.99             | 56                           | -5.78             | -5.55             | -8.36             |
| 20                           | -8.02             | -7.32             | -7.65             | 57                           | -6.41             | -6.46             | -8.09             |
| 21                           | -6.68             | -3.61             | -3.99             | 58                           | -5.74             | -7.82             | -6.76             |
| 22                           | -5.20             | -8.19             | -6.71             | 59                           | -5.59             | -5.09             | -6.05             |
| 23                           | -3.71             | -4.29             | -3.74             | 60                           | -5.60             | -5.64             | -7.43             |
| 24                           | -4.96             | -8.04             | -6.79             | 61                           | -6.20             | -6.95             | -7.53             |
| 25                           | -5.99             | -6.89             | -5.68             | 62                           | -5.96             | -6.87             | -9.32             |
| 26                           | -5.39             | -4.88             | -7.76             | 63                           | -6.53             | -6.13             | -6.38             |
| 27                           | -5.56             | -6.78             | -7.36             | 64                           | -6.26             | -6.91             | -4.98             |
| 28                           | -5.11             | -5.74             | -7.32             | 65                           | -5.79             | -6.09             | -7.72             |
| 29                           | -4.99             | -5.07             | -6.20             | 66                           | -6.04             | -7.55             | -7.60             |
| 30                           | -3.70             | -5.33             | -6.27             | 67                           | -4.83             | -6.21             | -8.03             |
| 31                           | -6.20             | -6.13             | -8.06             | 68                           | -6.08             | -3.55             | -6.46             |
| 32                           | -5.42             | -4.64             | -6.70             | 69                           | -5.95             | -6.37             | -4.85             |
| 33                           | -5.62             | -5.56             | -7.35             | 70                           | -5.66             | -7.09             | -7.66             |
| 34                           | -4.76             | -6.38             | -6.38             | 71                           | -5.19             | -5.81             | -8.41             |
| 35                           | -3.89             | -4.99             | -5.57             | 72                           | -5.94             | -5.18             | -7.16             |
| 36                           | -7.17             | -6.61             | -6.97             | 73                           | -5.05             | -7.87             | -7.77             |
| 37                           | -5.07             | -6.47             | -6.08             |                              |                   |                   |                   |

Table S4. GlideScore (G-Score) docking results of 73 deprotonated compounds for X-ray structures 2rd0, 2a5u and 2wxl.

| Compound #<br>protonated | G-Score<br>(2rd0<br>IFD) | G-Score<br>(2wxl<br>model) | G-Score<br>(model<br>3) | G-Score<br>(model<br>5) | Compound<br>#<br>protonated | G-Score<br>(2rd0<br>IFD) | G-Score<br>(2wxl<br>model) | G-Score<br>(model<br>3) | G-Score<br>(model<br>5) |
|--------------------------|--------------------------|----------------------------|-------------------------|-------------------------|-----------------------------|--------------------------|----------------------------|-------------------------|-------------------------|
| 1 AS604850               | -8.36                    | -9.33                      | -10.38                  | -10.03                  | 38                          | -7.25                    | -9.44                      | -8.15                   | -9.93                   |
| 2 AS605240               | -8.51                    | -10.19                     | -10.37                  | -10.95                  | 39                          | -7.83                    | -9.48                      | -7.28                   | -10.47                  |
| 3                        | -7.66                    | -10.74                     | -10.83                  | -10.23                  | 40                          | -9.31                    | -9.17                      | -9.95                   | -11.35                  |
| 4                        | -9.39                    | -11.66                     | -9.65                   | -10.52                  | 41                          | -7.80                    | -8.03                      | -9.70                   | -10.70                  |
| 5                        | -6.61                    | -10.60                     | -10.93                  | -9.77                   | 42                          | -7.73                    | -9.23                      | -9.89                   | -10.56                  |
| 6                        | -8.18                    | -11.57                     | -12.41                  | -8.94                   | 43                          | -8.12                    | -10.37                     | -10.65                  | -11.18                  |
| 7                        | -9.57                    | -11.65                     | -10.54                  | -10.71                  | 44                          | -8.99                    | -9.55                      | -11.25                  | -12.21                  |
| 8                        | -8.27                    | -9.65                      | -10.97                  | -10.91                  | 45                          | -7.85                    | -10.31                     | -7.58                   | -8.94                   |
| 9                        | -7.89                    | -8.96                      | -9.41                   | -9.94                   | 46                          | -8.21                    | -9.39                      | -8.42                   | -11.96                  |
| 10                       | -7.75                    | -9.29                      | -9.69                   | -9.99                   | 47                          | -8.66                    | -12.42                     | -10.74                  | -11.59                  |
| 11                       | -9.08                    | -10.07                     | -4.86                   | -10.52                  | 48                          | -7.47                    | -10.84                     | -8.03                   | -8.87                   |
| 12                       | -9.44                    | -11.25                     | -10.45                  | -10.40                  | 49                          | -7.72                    | -10.10                     | -9.54                   | -12.15                  |
| 13                       | -8.99                    | -11.53                     | -11.19                  | -12.02                  | 50                          | -8.68                    | -10.68                     | -9.83                   | -11.27                  |
| 14                       | -7.67                    | -9.05                      | -9.49                   | -9.85                   | 51                          | -7.97                    | -8.22                      | -9.19                   | -9.70                   |
| 15                       | -9.27                    | -10.20                     | -8.46                   | -10.31                  | 52                          | -8.48                    | -8.58                      | -9.34                   | -9.29                   |
| 16                       | -7.52                    | -8.92                      | -8.67                   | -10.19                  | 53                          | -8.55                    | -10.09                     | -9.12                   | -11.14                  |
| 17                       | -8.13                    | -8.05                      | -7.79                   | -9.76                   | 54                          | -7.52                    | -7.14                      | -7.94                   | -11.45                  |
| 18                       | -8.86                    | -11.01                     | -10.39                  | -11.28                  | 55                          | -8.72                    | -9.09                      | -9.90                   | -10.50                  |
| 19                       | -8.49                    | -8.01                      | -11.53                  | -10.98                  | 56                          | -9.16                    | -13.69                     | -10.20                  | -12.35                  |
| 20                       | -6.98                    | -9.78                      | -9.60                   | -10.33                  | 57                          | -7.90                    | -8.86                      | -9.79                   | -10.80                  |
| 21                       | -8.24                    | -6.95                      | -7.96                   | -9.85                   | 58                          | -8.12                    | -8.71                      | -7.23                   | -11.12                  |
| 22                       | -8.33                    | -8.17                      | -10.84                  | -11.36                  | 59                          | -8.19                    | -8.60                      | -7.73                   | -10.26                  |
| 23                       | -5.82                    | -7.56                      | -3.84                   | -6.67                   | 60                          | -7.62                    | -8.76                      | -8.24                   | -9.55                   |
| 24                       | -8.83                    | -9.89                      | -10.59                  | -10.83                  | 61                          | -8.30                    | -10.69                     | -10.59                  | -10.74                  |
| 25                       | -7.99                    | -8.44                      | -9.12                   | -10.88                  | 62                          | -8.26                    | -8.94                      | -11.32                  | -10.64                  |
| 26                       | -9.12                    | -10.50                     | -9.26                   | -11.56                  | 63                          | -8.54                    | -9.14                      | -10.78                  | -11.35                  |
| 27                       | -5.85                    | -8.28                      | -8.00                   | -9.07                   | 64                          | -8.22                    | -9.57                      | -10.98                  | -11.18                  |
| 28                       | -7.85                    | -9.49                      | -9.05                   | -11.93                  | 65                          | -8.56                    | -9.22                      | -10.73                  | -11.39                  |
| 29                       | -7.69                    | -8.29                      | -9.76                   | -9.88                   | 66                          | -8.93                    | -10.08                     | -11.00                  | -11.80                  |
| 30                       | -7.73                    | -8.51                      | -8.84                   | -9.78                   | 67                          | -9.24                    | -9.23                      | -10.03                  | -11.36                  |
| 31                       | -7.30                    | -8.75                      | -8.29                   | -10.00                  | 68                          | -7.54                    | -10.07                     | -9.65                   | -10.22                  |
| 32                       | -9.23                    | -9.03                      | -7.39                   | -10.83                  | 69                          | -7.95                    | -11.29                     | -10.53                  | -9.80                   |
| 33                       | -7.44                    | -8.62                      | -7.76                   | -9.13                   | 70                          | -8.34                    | -9.65                      | -11.20                  | -11.28                  |
| 34                       | -7.24                    | -8.02                      | -8.14                   | -10.04                  | 71                          | -8.21                    | -10.04                     | -10.44                  | -10.87                  |
| 35                       | -7.29                    | -8.18                      | -7.88                   | -9.09                   | 72                          | -7.80                    | -9.61                      | -10.07                  | -9.75                   |
| 36                       | -7.78                    | -9.18                      | -9.69                   | -11.25                  | 73                          | -8.95                    | -9.74                      | -9.42                   | -10.82                  |
| 37                       | -7.83                    | -8.41                      | -8.09                   | -10.09                  |                             |                          |                            |                         |                         |

Table S5. GlideScore (G-Score) docking results of 73 protonated compounds for homology model, 2rd0 induced fit and homology model induced fit.

## Experimental

<sup>1</sup>H-NMR spectra were recorded with either a 300 MHz Varian widebore NMR spectrometer or a 400 MHz Bruker Ultrashield-Avance III NMR spectrometer. <sup>13</sup>C-NMR spectra were recorded with either a 600 MHz Varian Oxford AS600-Unity Inova NMR spectrometer or a 400 MHz Bruker Ultrashield-Avance III NMR spectrometer. Results were recorded as follows: chemical shift values are expressed  $\delta$  units acquired in DMSO (2.50 ppm) as reference, multiplicity (s = singlet, d = doublet, t = triplet, q = quartet, m = multiplet), integration and coupling constants (*J*) in Hertz. Mass spectra were acquired in the positive and negative mode using electrospray ionization obtained on a Micromass Platform II single quadrupole mass spectrometer equipped with an atmospheric pressure (ESI/APCI) ion source with sample management facilitated by an Agilent 1100 series HPLC system using MassLynx version 3.5 software. High Resolution Mass Spectrometry analyses were collected on a Waters Micromass LCT Premier XE Orthogonal Acceleration Time-of-Flight Mass Spectrometer coupled to an Alliance 2795 Separation Module using MassLynx version 4.1 software. Melting point determination was performed uncorrected using a Mettler Toledo MP50 melting point apparatus.

**Synthesis:** A mixture of the aldehyde (1 eq), rhodanine or thiazolidinedione (2 eq),  $\beta$ -alanine (2 eq), in glacial acetic acid was heated at 100 °C for 3 hr. Upon cooling, the product was isolated by filtration and washed with glacial acetic acid and water. If required, purification via crystallization as described.

**(Z)-5-(benzo[d][1,3]dioxol-5-ylmethylene)thiazolidine-2,4-dione (3):** 99% yellow powder. mp: 246-249 °C (lit. 247-249 °C)<sup>[1]</sup>; <sup>1</sup>H-NMR (300 MHz, [D<sub>6</sub>]DMSO),  $\delta$  12.5 (br s, 1H), 7.71 (s, 1H), 7.14 (m, 3H), 6.13 (s, 2H); ESI-MS, *m/z* 248.1 [M-H]<sup>-</sup>.

**(Z)-5-(benzo[d][1,3]dioxol-5-ylmethylene)-2-thioxothiazolidin-4-one (4):** 100% orange crystals; mp: 247 °C (dec.) (lit. 246-250 °C)<sup>[2]</sup>; <sup>1</sup>H-NMR (300 MHz, [D<sub>6</sub>]DMSO),  $\delta$  13.7 (br s, 1H), 7.58 (s, 1H), 7.14 (m, 3H), 6.14 (s, 2H); ESI-MS, *m/z* 266.1 [M+H]<sup>+</sup>.

**(Z)-5-(benzo[d][1,3]dioxol-5-ylmethylene)-4-thioxothiazolidin-2-one (5):** 100% red crystals; mp: 264 °C (dec.); <sup>1</sup>H-NMR (300 MHz, [D<sub>6</sub>]DMSO),  $\delta$  13.9 (br s, 1H), 8.04 (s, 1H), 7.27 (d, *J* = 8.1 Hz, 1H), 7.21 (s, 1H), 7.10 (d, *J* = 8.2 Hz, 1H), 6.15 (s, 2H); <sup>13</sup>C (75 MHz, [D<sub>6</sub>]DMSO),  $\delta$  195.14, 170.63, 150.02, 148.45, 136.43, 127.74, 127.63, 127.31, 109.46, 109.46, 102.33; ESI-MS, *m/z* 264.1 [M-H]<sup>-</sup>.

**(Z)-5-(benzo[d][1,3]dioxol-5-ylmethylene)imidazolidine-2,4-dione (6):** 93% off-white powder; mp 239-242 °C; <sup>1</sup>H-NMR (300 MHz, [D<sub>6</sub>]DMSO),  $\delta$  13.7 (br s, 1H), 7.27 (d, *J* = 1.7 Hz, 1H), 7.13 (dd, *J* = 8.4, 1.8 Hz, 1H), 6.95 (d, *J* = 8.1 Hz, 1H), 6.36 (s, 1H), 6.07 (s, 2H); ESI-MS, *m/z* 233.1 [M+H]<sup>+</sup>; HRMS (ESI): [M-H]<sup>-</sup> 231.0421 observed 231.0411 [M-H]<sup>-</sup> calculated.

**(Z)-5-(benzo[d][1,3]dioxol-5-ylmethylene)thiazolidine-2,4-dithione (7):** 98% purple powder; mp: 230 °C (dec.) (MeCN/H<sub>2</sub>O, 4:1); <sup>1</sup>H-NMR (300 MHz, [D<sub>6</sub>]DMSO),  $\delta$  7.78 (s, 1H), 7.29 (d, *J* = 8.2 Hz, 1H), 7.23 (s, 1H), 7.14 (d, *J* = 8.2 Hz, 1H), 6.17 (s, 2H); <sup>13</sup>C NMR (100 MHz, [D<sub>6</sub>]DMSO),  $\delta$  196.68, 195.89, 150.39, 148.58, 135.60, 132.16, 128.03, 127.85, 109.61, 109.56, 102.41; ; HRMS (ESI): [M-H]<sup>-</sup> 279.9586 observed 279.9566 [M-H]<sup>-</sup> calculated

**(Z)-5-(2,3-dihydroxybenzylidene)-2-thioxothiazolidin-4-one (8):** 59% brown needles; mp: 225-227 °C; <sup>1</sup>H-NMR (300 MHz, [D<sub>6</sub>]DMSO),  $\delta$  13.73 (br s, 1H), 9.91 (s, 1H), 9.58 (s, 1H), 7.87 (s, 1H), 6.93 (dd, *J* = 3.3Hz, 1H), 6.79 (d, *J* = 2.0 Hz, 1H), 6.78 (s, 1H); <sup>13</sup>C NMR (100 MHz, [D<sub>6</sub>]DMSO),  $\delta$  196.15, 169.56, 146.38, 145.90, 127.74, 123.75, 120.58, 119.88, 119.15, 117.94; HRMS (ESI): 253.9924 [M+H]<sup>+</sup> observed 253.9940 [M+H]<sup>+</sup> calculated.

**(Z)-5-(2-hydroxy-4-methoxybenzylidene)-2-thioxothiazolidin-4-one (9)**: 75% brown crystals; mp: 229 °C (dec.); <sup>1</sup>H-NMR (300 MHz, [D<sub>6</sub>]DMSO), δ 13.63 (br s, 1H), 10.83 (s, 1H), 7.81 (s, 1H), 7.26 (d, *J* = 8.8 Hz, 1H), 6.59 (dd, *J* = 8.8, 2.5 Hz, 1H), 6.51 (d, *J* = 2.5 Hz, 1H), 3.78 (s, 3H); <sup>13</sup>C NMR (150 MHz, [D<sub>6</sub>]DMSO), δ 195.77, 169.62, 163.28, 159.55, 130.95, 127.54, 120.29, 113.20, 107.12, 101.13, 55.45; HRMS (ESI): 265.9953 [M-H]<sup>-</sup> observed 265.9951 [M-H]<sup>-</sup> calculated.

**(Z)-5-(4-(allyloxy)benzylidene)-2-thioxothiazolidin-4-one (10)**: 81% green crystals; mp: 197-199 °C; <sup>1</sup>H-NMR (300 MHz, [D<sub>6</sub>]DMSO), δ 13.72 (br s, 1H), 7.61 (s, 1H), 7.57 (d, *J* = 9.0 Hz, 2H), 7.13 (d, *J* = 9.0 Hz, 2H), 6.06 (m, 1H), 5.36 (ddq, *J* = 33.9, 10.5, 1.5 Hz, 2H), 4.67 (dt, *J* = 5.2, 1.5 Hz, 2H); HRMS (ESI): 276.0137 [M-H]<sup>-</sup> observed 276.0158 [M-H]<sup>-</sup> calculated.

**(Z)-5-(4-hydroxy-3,5-dimethylbenzylidene)-2-thioxothiazolidin-4-one (11)**: 87% green crystals; mp: 282-286 °C; <sup>1</sup>H-NMR (300 MHz, [D<sub>6</sub>]DMSO), δ 13.7 (br s, 1H), 9.31 (s, 1H), 7.49 (s, 1H), 7.22 (s, 2H), 2.23 (s, 6H); HRMS (ESI): 264.0164 [M-H]<sup>-</sup> observed 264.0158 [M-H]<sup>-</sup> calculated.

**(Z)-5-(4-hydroxy-3-methylbenzylidene)-2-thioxothiazolidin-4-one (12)**: 92% yellow powder; mp: 296-298 °C; <sup>1</sup>H-NMR (300 MHz, [D<sub>6</sub>]DMSO), δ 13.7 (br s, 1H), 10.36 (s, 1H), 7.51 (s, 1H), 7.32 (dd, *J* = 4.5, 12 Hz, 2H), 6.94 (d, *J* = 9 Hz, 1H), 2.15 (s, 3H); <sup>13</sup>C NMR (150 MHz, [D<sub>6</sub>]DMSO), δ 195.58, 169.49, 158.75, 133.69, 132.71, 130.66, 125.53, 123.86, 120.63, 115.64, 15.90; HRMS (ESI): 250.0002 [M-H]<sup>-</sup> observed 250.0002 [M-H]<sup>-</sup> calculated.

**(Z)-5-(3-hydroxy-4-methoxybenzylidene)-2-thioxothiazolidin-4-one (13)**: 100% yellow solid; mp: 225-227 °C; <sup>1</sup>H-NMR (300 MHz, [D<sub>6</sub>]DMSO), δ 13.74 (br s, 1H), 9.58 (s, 1H), 7.52 (s, 1H), 7.12 (d, *J* = 1.8 Hz, 1H), 7.10 (s, 1H), 7.03 (d, *J* = 1.8 Hz, 1H), 3.84 (s, 3H); HRMS (ESI): 266.4987 [M-H]<sup>-</sup> observed 266.4988 [M-H]<sup>-</sup> calculated.

**(Z)-5-((2,6-dichloropyridin-3-yl)methylene)-2-thioxothiazolidin-4-one (14)**: 957% yellow needles; mp: 226-228 °C; <sup>1</sup>H-NMR (300 MHz, [D<sub>6</sub>]DMSO), δ 11.95 (br s, 1H), 8.00 (d, *J* = 7.9 Hz, 1H), 7.72 (d, *J* = 7.9 Hz, 1H), 7.56 (s, 1H); <sup>13</sup>C NMR (100 MHz, [D<sub>6</sub>]DMSO), δ 194.95, 172.04, 169.03, 149.88, 149.55, 140.59, 131.81, 127.40, 124.56, 123.26; HRMS (ESI): 288.9000 [M-H]<sup>-</sup> observed 288.9069 [M-H]<sup>-</sup> calculated.

**(Z)-5-(pyridin-3-ylmethylene)-2-thioxothiazolidin-4-one (15)**: 91% yellow powder; mp: 291-293 °C; <sup>1</sup>H-NMR (300 MHz, [D<sub>6</sub>]DMSO), δ 8.84 (d, *J* = 2.3 Hz, 1H), 8.64 (dd, *J* = 4.8, 1.5 Hz, 1H), 7.95 (dt, *J* = 8, 1.9 Hz, 1H), 7.68 (s, 1H), 7.57 (dd, *J* = 8.1, 4.8 Hz, 1H); <sup>13</sup>C NMR (100 MHz, [D<sub>6</sub>]DMSO) δ 195.50, 169.39, 151.84, 150.87, 136.34, 129.16, 128.20, 127.98, 124.54; HRMS (ESI): 220.9848 [M-H]<sup>-</sup> observed 220.9849 [M-H]<sup>-</sup> calculated.

**(Z)-4-((4-oxo-2-thioxothiazolidin-5-ylidene)methyl)benzointrile (16)**: 89% yellow powder; mp: 286 °C (dec.); <sup>1</sup>H-NMR (300 MHz, [D<sub>6</sub>]DMSO), δ 7.99 (d, *J* = 8.4 Hz, 2H), 7.78 (d, *J* = 8.3 Hz, 2H), 7.70 (s, 1H); <sup>13</sup>C NMR (100 MHz, [D<sub>6</sub>]DMSO), δ 195.24, 169.24, 137.34, 133.07, 133.05, 130.79, 130.77, 129.17, 129.15, 118.37, 112.20; HRMS (ESI): 244.9844 [M-H]<sup>-</sup> observed 244.9849 [M-H]<sup>-</sup> calculated.

**(Z)-5-(4-nitrobenzylidene)-2-thioxothiazolidin-4-one (17)**: 88% yellow needles; mp: 252-255 °C; <sup>1</sup>H-NMR (300 MHz, [D<sub>6</sub>]DMSO), δ 8.34 (d, *J* = 8.8 Hz, 2H), 7.87 (d, *J* = 8.8 Hz, 2H), 7.75 (s, 1H); HRMS (ESI): 264.9747 [M-H]<sup>-</sup> observed 264.9753 [M-H]<sup>-</sup> calculated.

**(Z)-4-((4-oxo-2-thioxothiazolidin-5-ylidene)methyl)benzoic acid (18)**: 93% yellow powder; mp: >300 °C; <sup>1</sup>H-NMR (300 MHz, [D<sub>6</sub>]DMSO), δ 13.19 (br s, 1H), 8.06 (d, *J* = 8.3 Hz, 2H), 7.73 (s, 1H), 7.69 (d, *J* = 4.5 Hz, 2H); HRMS (ESI): 263.9796 [M-H]<sup>-</sup> observed 263.9795 [M-H]<sup>-</sup> calculated.

**(Z)-5-(quinoxalin-6-ylmethylene)-2-thioxothiazolidin-4-one (19)**: 88% brown crystals; mp: 297 °C (dec.); <sup>1</sup>H-NMR (300 MHz, [D<sub>6</sub>]DMSO), δ 9.03 (d, *J* = 3.3 Hz, 2H), 8.32 (s, 1H), 8.23 (d, *J* = 8.7 Hz, 1H), 8.05 (d, *J* = 8.7 Hz, 1H), 7.91 (s, 1H); HRMS (ESI): 271.9967 [M-H]<sup>-</sup> observed 271.9958 [M-H]<sup>-</sup> calculated.

**(Z)-5-((2,2-difluorobenzo[d][1,3]dioxol-5-yl)methylene)-2-thioxothiazolidin-4-one (20):** 84% yellow powder; mp: 181-183 °C; <sup>1</sup>H-NMR (300 MHz, [D<sub>6</sub>]DMSO), δ 11.90 (br s, 1H), 7.64 (d, *J* = 1.5 Hz, 1H), 7.58 (s, 1H), 7.57 (d, *J* = 8.4 Hz, 1H), 7.45 (dd, *J* = 8.7, 1.8 Hz, 1H); HRMS (ESI): 299.9619 [M-H]<sup>-</sup> observed 299.9606 [M-H]<sup>-</sup> calculated.

**(Z)-2-thioxo-5-(2,3,4-trimethoxybenzylidene)thiazolidin-4-one (21):** 95% yellow solid; mp: 206-209 °C (MeOH); <sup>1</sup>H-NMR (300 MHz, [D<sub>6</sub>]DMSO), δ 13.70 (br s, 1H), 7.67 (s, 1H), 7.17 (d, *J* = 8.8 Hz, 1H), 7.01 (d, *J* = 8.9 Hz, 1H), 3.87 (s, 6H), 3.77 (s, 3H); HRMS (ESI): 310.02192 [M-H]<sup>-</sup> observed 310.0213 [M-H]<sup>-</sup> calculated.

**(Z)-5-((5-bromo-1H-indol-3-yl)methylene)-2-thioxothiazolidin-4-one (22):** 84% red powder; mp: >300 °C; <sup>1</sup>H-NMR (300 MHz, [D<sub>6</sub>]DMSO), δ 13.58 (s, 1H), 12.43 (s, 1H), 8.22 (d, *J* = 1.7 Hz, 1H), 7.95 (s, 1H), 7.85 (d, *J* = 3.0 Hz, 1H), 7.40 (m, 2H); HRMS (ESI): 336.9102 [M-H]<sup>-</sup> observed 336.9110 [M-H]<sup>-</sup> calculated.

**(Z)-5-(2,3-di-tert-butyl-4-hydroxybenzylidene)-2-thioxothiazolidin-4-one (23):** 53% orange needles; mp: 256-257 °C (MeOH); <sup>1</sup>H-NMR (300 MHz, [D<sub>6</sub>]DMSO), δ 13.73 (br s, 1H), 7.91 (s, 1H), 7.63 (s, 1H), 7.37 (s, 2H), 1.41 (s, 18H); <sup>13</sup>C NMR (150 MHz, [D<sub>6</sub>]DMSO), δ 195.46, 169.38, 157.10, 139.51, 133.62, 128.14, 128.12, 124.35, 124.34, 121.01, 34.63, 29.96; HRMS (ESI): 348.1104 [M-H]<sup>-</sup> observed 348.1097 [M-H]<sup>-</sup> calculated.

**(Z)-5-((1H-indol-3-yl)methylene)-2-thioxothiazolidin-4-one (24):** 91% orange needles; mp: 285-289 °C; <sup>1</sup>H-NMR (300 MHz, [D<sub>6</sub>]DMSO), δ 13.57 (br s, 1H), 12.32 (s, 1H), 7.95 (s, 1H), 7.93 (s, 1H), 7.83 (d, *J* = 3.0 Hz, 1H), 7.51 (d, *J* = 7.3 Hz, 1H), 7.24 (m, 2H); HRMS (ESI): 259.0013 [M-H]<sup>-</sup> observed 259.0006 [M-H]<sup>-</sup> calculated.

**(Z)-5-(2-hydroxy-3-methoxybenzylidene)-2-thioxothiazolidin-4-one (25):** 88% yellow needles; mp: 244 °C (dec.); <sup>1</sup>H-NMR (300 MHz, [D<sub>6</sub>]DMSO), δ 9.88 (s, 1H), 7.86 (s, 1H), 7.11 (dd, *J* = 6.4, 3.1 Hz, 1H), 6.93 (d, *J* = 6.8 Hz, 1H), 6.91 (s, 1H), 3.82 (s, 3H); ESI-MS, *m/z* 266.3 [M-H]<sup>-</sup>.

**(Z)-5-(3-(1,1,2,2-tetrafluoroethoxy)benzylidene)-2-thioxothiazolidin-4-one (26):** 77% yellow crystals; mp: 189-191 °C (MeOH); <sup>1</sup>H-NMR (300 MHz, CDCl<sub>3</sub>), δ 9.28 (s, 1H), 7.62 (s, 1H), 7.52 (dd, *J* = 11.8, 4.8 Hz, 1H), 7.40 (d, *J* = 7.9 Hz, 1H), 7.33 (s, 1H), 7.32 (d, *J* = 6.9 Hz, 1H), 5.95 (tt, *J* = 53, 2.8 Hz); <sup>13</sup>C NMR (100 MHz, [D<sub>6</sub>]DMSO) δ 195.51, 169.35, 148.85, 135.38, 135.06, 131.43, 130.01, 128.57, 127.37, 126.93, 123.56, 123.24 (*J* = 240 Hz); HRMS (ESI): 335.9771 [M-H]<sup>-</sup> observed 335.9782 [M-H]<sup>-</sup> calculated.

**(Z)-5-(2-hydroxy-4,6-dimethoxybenzylidene)-2-thioxothiazolidin-4-one (27):** 80% brown crystals; mp: 239-242 °C; <sup>1</sup>H-NMR (300 MHz, [D<sub>6</sub>]DMSO), δ 13.34 (br s, 1H), 10.96 (s, 1H), 7.86 (s, 1H), 6.15 (d, *J* = 6.3 Hz, 2H), 3.86 (s, 3H), 3.79 (s, 3H); <sup>13</sup>C NMR (150 MHz, [D<sub>6</sub>]DMSO), δ 197.47, 172.03, 169.96, 164.60, 159.96, 126.74, 121.11, 102.85, 93.61, 90.34, 55.52, 55.49; ESI-MS, *m/z* 296.2 [M-H]<sup>-</sup>.

**(Z)-5-(2-(benzyloxy)-3-methoxybenzylidene)-2-thioxothiazolidin-4-one (28):** 82% yellow powder; mp: 182-184 °C; <sup>1</sup>H-NMR (300 MHz, [D<sub>6</sub>]DMSO), δ 7.67 (s, 1H), 7.30 (ddd, *J* = 25.5, 5.8, 4 Hz, 7H), 6.95 (dd, *J* = 6.4, 2.7 Hz, 1H), 5.03 (s, 2H), 3.90 (s, 3H); <sup>13</sup>C NMR (100 MHz, [D<sub>6</sub>]DMSO) δ 195.94, 169.10, 152.89, 146.77, 136.54, 128.67, 128.34, 128.16, 127.41, 126.75, 126.36, 125.07, 119.84, 115.56, 75.01, 56.01; HRMS (ESI): 356.0406 [M-H]<sup>-</sup> observed 356.0421 [M-H]<sup>-</sup> calculated.

**(Z)-5-(2-chloro-5-nitrobenzylidene)-2-thioxothiazolidin-4-one (29):** 79% yellow needles; mp: 250-252 °C; <sup>1</sup>H-NMR (300 MHz, [D<sub>6</sub>]DMSO), δ 8.29 (dd, *J* = 2.7, 8.7 Hz, 1H), 8.27 (d, *J* = 2.4 Hz, 1H), 7.95 (d, *J* = 8.7 Hz, 1H), 7.68 (s, 1H); <sup>13</sup>C NMR (100 MHz, [D<sub>6</sub>]DMSO) δ 194.92, 169.38, 146.73, 140.68, 132.48,

132.42, 131.81, 125.93, 123.86, 123.56; HRMS (ESI): 298.9353 [M-H]<sup>-</sup> observed 298.9357 [M-H]<sup>-</sup> calculated.

**(Z)-5-(2-nitrobenzylidene)-2-thioxothiazolidin-4-one (30)**: 100% yellow crystals; mp: 197-199 °C; <sup>1</sup>H-NMR (300 MHz, [D<sub>6</sub>]DMSO), δ 11.90 (br s, 1H), 8.20 (d, *J* = 8.1 Hz, 1H), 7.87 (d, *J* = 9.2 Hz, 2H), 7.72 (dd, *J* = 10.9, 7.8 Hz, 2H); HRMS (ESI): 264.9737 [M-H]<sup>-</sup> observed 264.9747 [M-H]<sup>-</sup> calculated.

**(Z)-5-(4-ethoxybenzylidene)-2-thioxothiazolidin-4-one (31)**: 100% yellow crystals; mp: 225-227 °C; <sup>1</sup>H-NMR (300 MHz, [D<sub>6</sub>]DMSO), δ 13.70 (br s, 1H), 11.90 (br s, 1H), 7.61 (s, 1H), 7.56 (d, *J* = 9.0 Hz, 2H), 7.10 (d, *J* = 8.7 Hz, 2H), 4.11 (q, *J* = 7.0 Hz, 2H), 1.34 (t, *J* = 7.0 Hz, 3H); HRMS (ESI): 264.0158 [M-H]<sup>-</sup> observed 264.0165 [M-H]<sup>-</sup> calculated.

**(Z)-5-(3,5-dibromobenzylidene)-2-thioxothiazolidin-4-one (32)**: 93% yellow crystals; mp: 276-278 °C; <sup>1</sup>H-NMR (300 MHz, [D<sub>6</sub>]DMSO), δ 7.98 (t, *J* = 1.7 Hz, 1H), 7.78 (d, *J* = 1.6 Hz, 2H), 7.60 (s, 1H); HRMS (ESI): 375.8107 [M-H]<sup>-</sup> observed 375.8124 [M-H]<sup>-</sup> calculated.

**(Z)-5-(5-hydroxy-2-nitrobenzylidene)-2-thioxothiazolidin-4-one (33)**: 66% green needles; mp: 225 °C (decomp.); <sup>1</sup>H-NMR (300 MHz, [D<sub>6</sub>]DMSO), δ 13.80 (br s, 1H), 11.31 (s, 1H), 8.16 (d, *J* = 8.8 Hz, 1H), 7.91 (s, 1H), 7.07-6.95 (m, 2H); HRMS (ESI): 280.9696 [M-H]<sup>-</sup> observed 280.9686 [M-H]<sup>-</sup> calculated.

**(Z)-5-(2-hydroxy-5-nitrobenzylidene)-2-thioxothiazolidin-4-one (34)**: 100% brown crystals; mp: 253 °C (EtOH); <sup>1</sup>H-NMR (300 MHz, [D<sub>6</sub>]DMSO), δ 8.20 (m, 2H), 7.74 (s, 1H), 7.12 (d, *J* = 9.0 Hz, 1H); <sup>13</sup>C NMR (100 MHz, [D<sub>6</sub>]DMSO), δ 195.28, 169.27, 162.82, 127.75, 127.11, 124.99, 124.57, 120.39, 116.63; HRMS (ESI): 280.9684 [M-H]<sup>-</sup> observed 280.9686 [M-H]<sup>-</sup> calculated.

**(Z)-5-(2-methoxy-5-nitrobenzylidene)-2-thioxothiazolidin-4-one (35)**: 96% orange crystals; mp: 251-254 °C; <sup>1</sup>H-NMR (300 MHz, [D<sub>6</sub>]DMSO), δ 8.37 (dd, *J* = 9.2, 2.8 Hz, 1H), 8.22 (d, *J* = 2.7 Hz, 1H), 7.71 (s, 1H), 7.38 (d, *J* = 9.3 Hz, 1H), 4.06 (s, 3H); <sup>13</sup>C NMR (100 MHz, [D<sub>6</sub>]DMSO), δ 195.21, 169.14, 162.42, 140.79, 128.42, 127.81, 124.64, 123.97, 121.98, 112.65, 57.11; HRMS (ESI): 294.9839 [M-H]<sup>-</sup> observed 294.9853 [M-H]<sup>-</sup> calculated.

**(Z)-5-((5-chlorobenzo[*b*]thiophen-3-yl)methylene)-2-thioxothiazolidin-4-one (36)**: 96% yellow solid; mp: 297-299 °C; <sup>1</sup>H-NMR (300 MHz, [D<sub>6</sub>]DMSO), δ 13.85 (br s, 1H), 8.32 (d, *J* = 1.9 Hz, 1H), 8.22 (s, 1H), 8.16 (d, *J* = 8.7 Hz, 1H), 7.92 (s, 1H), 7.54 (dd, *J* = 8.6, 1.9 Hz, 1H); HRMS (ESI): 309.9220 [M-H]<sup>-</sup> observed 309.9227 [M-H]<sup>-</sup> calculated.

**(Z)-5-(4-(diethylamino)-2-hydroxybenzylidene)-2-thioxothiazolidin-4-one (37)**: 100% red powder; mp: 277 °C (dec.); <sup>1</sup>H-NMR (300 MHz, [D<sub>6</sub>]DMSO), δ 13.60 (br s, 1H), 7.52 (s, 1H), 7.43 (d, *J* = 9.0 Hz, 2H), 6.83 (d, *J* = 9.0 Hz, 2H), 4.05 (s, 3H), 3.04 (d, *J* = 2.9 Hz, 7H); ESI-MS, *m/z* 307.2 [M-H]<sup>-</sup>.

**(Z)-5-(4-(pyridin-2-yl)benzylidene)-2-thioxothiazolidin-4-one (38)**: 81% yellow needles; mp: 264-266 °C; <sup>1</sup>H-NMR (300 MHz, [D<sub>6</sub>]DMSO), δ 8.71 (d, *J* = 3.8 Hz, 1H), 8.26 (d, *J* = 8.4 Hz, 2H), 8.07 (d, *J* = 8.0 Hz, 1H), 7.92 (td, *J* = 7.8, 1.7 Hz, 1H), 7.73 (d, *J* = 8.4 Hz, 2H), 7.70 (s, 1H), 7.41 (dd, *J* = 7.2, 4.8 Hz, 1H); <sup>13</sup>C NMR (150 MHz, [D<sub>6</sub>]DMSO) δ 195.47, 169.42, 154.55, 149.75, 140.22, 137.38, 133.21, 131.24, 130.93, 127.32, 126.22, 125.90, 123.08, 120.85; HRMS (ESI): 299.0307 [M-H]<sup>-</sup> observed 299.0307 [M-H]<sup>-</sup> calculated.

**(Z)-5-(2-hydroxy-3,5-dinitrobenzylidene)-2-thioxothiazolidin-4-one (39)**: 44% red crystals; mp: 243-245 °C; <sup>1</sup>H-NMR (300 MHz, [D<sub>6</sub>]DMSO), δ 14.20 (br s, 1H), 9.19 (s, 1H), 8.77 (s, 1H), 8.22 (s, 1H); HRMS (ESI): 325.9550 [M-H]<sup>-</sup> observed 325.9547 [M-H]<sup>-</sup> calculated.

## References:

- [1] W. H. Burton, W. L. Budde, C. C. Cheng, *J.Med.Chem* **1970**, *13*, 1009.
- [2] K. Bourahla, A. Derdour, M. Rahmouni, F. Carreaux, J. P. Bazureau, *Tet. Let.* **2007**, *48*, 5785.
